# Supplementary material for: Dietary zerumbone from shampoo ginger: new insights into its antioxidant and anticancer activity
Source: Royal Society of Chemistry journal article supplement (doi:10.1039/c8fo02395f), 2019-01-01
Supplement: c8fo02395f1.pdf [file c8fo02395f1.pdf]

## **Dietary zerumbone from shampoo ginger: new insights into its antioxidant and anticancer activity**

**Corresponding Author: Antonella Rosa**

\* To whom correspondence should be addressed. Fax: ++39/070/6754032; Tel: ++39/070/6754124;

E-mail address: [anrosa@unica.it](mailto:anrosa@unica.it)

## **Supplementary information**

**ESI 1.** Calibration curves for fatty acid quantification in cancer HeLa cells.

| Fatty acid                                    | Retention time (min) | Mass o.c. (ng) | Correlation coefficient (R <sup>2</sup> ) | Calibration Curve Equation        | LOD (ng o.c.) |
|-----------------------------------------------|----------------------|----------------|-------------------------------------------|-----------------------------------|---------------|
| <i>ELSD detection (quadratic curve)</i>       |                      |                |                                           |                                   |               |
| 14:0                                          | 5.3                  | 500-3500       | 0.9950                                    | $y = 31.79x^2 - 68.088x + 73.757$ | 100           |
| 16:0                                          | 11.0                 | 1000-3500      | 0.9909                                    | $y = 11.834x^2 + 160.12x - 0.81$  | 100           |
| 18:0                                          | 23.6                 | 500-3000       | 0.9995                                    | $y = 9.2768x^2 + 0.4854x + 21.97$ | 150           |
| <i>DAD detection at 200 nm (linear curve)</i> |                      |                |                                           |                                   |               |
| 16:1 n-7                                      | 6.1                  | 1000-10000     | 0.9768                                    | $y = 849.09x - 575.16$            | 50            |
| 18:1 n-9                                      | 12.5                 | 1000-10000     | 0.9705                                    | $y = 548.06x - 332.64$            | 100           |
| 18:2 n-6                                      | 7.3                  | 500-6000       | 0.9953                                    | $y = 1080.7x - 742.11$            | 25            |
| 18:3 n-3                                      | 4.7                  | 500-6000       | 0.9835                                    | $y = 1142.4x - 808.03$            | 10            |
| 20:3 n-6                                      | 9.1                  | 500-6000       | 0.9952                                    | $y = 1364.9x - 885.0$             | 25            |
| 20:4 n-6                                      | 6.6                  | 500-6000       | 0.9973                                    | $y = 1951.4x - 1075.7$            | 10            |
| 20:5 n-3                                      | 4.5                  | 500-6000       | 0.9960                                    | $y = 2338.4x - 1315.7$            | 5             |
| 22:5 n-3                                      | 7.4                  | 1000-6000      | 0.9626                                    | $y = 5182.9x - 2319.8$            | 5             |
| 22:6 n-3                                      | 5.8                  | 500-6000       | 0.9961                                    | $y = 2233.1x - 1005.6$            | 5             |

*Abbreviation:* o.c., on column; LOD, Limit of Detection.
